# Supplementary material for: Prognostic impact of c-Rel nuclear expression and REL amplification and crosstalk between c-Rel and the p53 pathway in diffuse large B-cell lymphoma
Source: PubMed Central journal article supplement (PMC4695110; doi:10.18632/oncotarget.4319), 2015-06-30
Supplement: oncotarget-06-23157-s001.pdf [file oncotarget-06-23157-s001.pdf]

## SUPPLEMENTARY FIGURES AND TABLES

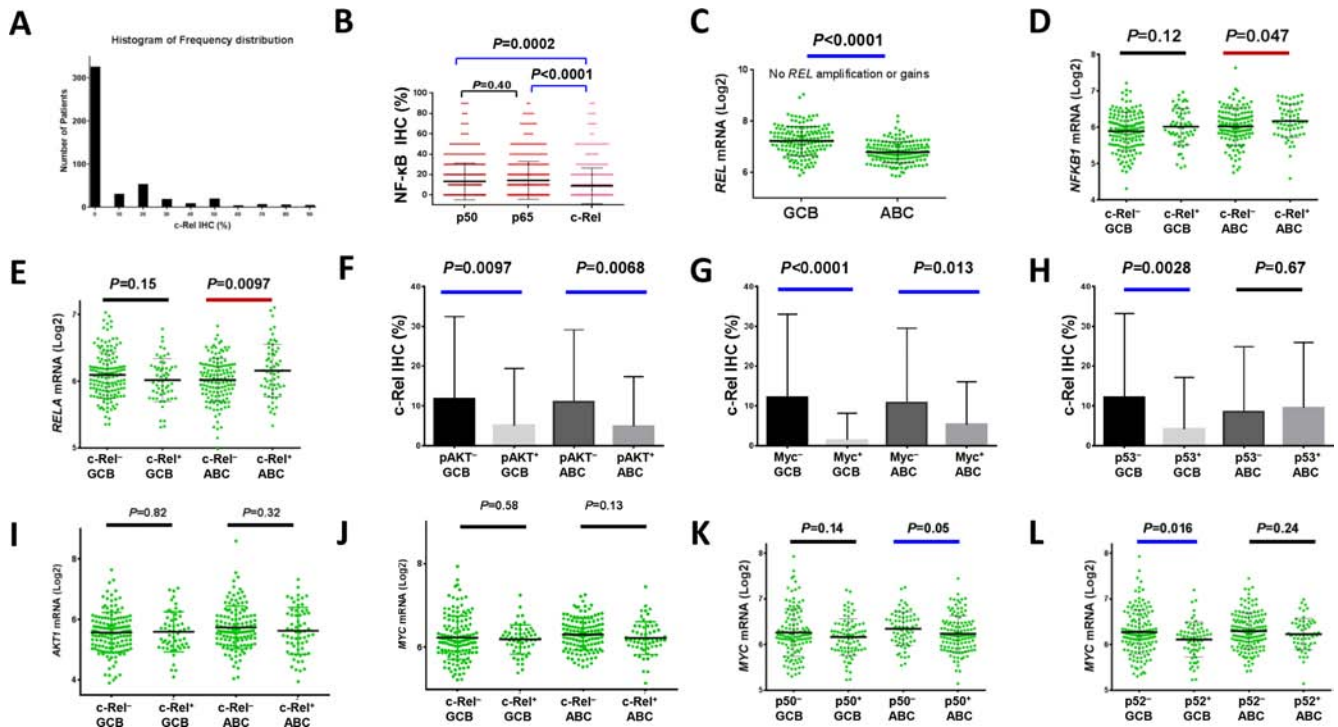

**Supplementary Figure S1.** A. Histogram of c-Rel nuclear expression in the DLBCL cohort. B. Expression level of c-Rel compared with p65 and p50 in DLBCL. C. GCB-DLBCL has significantly higher *REL* mRNA levels than ABC-DLBCL. D-E. In ABC-DLBCL, c-Rel positivity correlated with significantly higher *NFKB1* and *RELA* mRNA levels. F-H. pAKT, Myc and p53 overexpression correlated with significantly lower c-Rel levels in DLBCL (except in p53<sup>+</sup> ABC-DLBCL). I-J. c-Rel positivity did not correlate with *AKT1* and *MYC* mRNA levels. K. In ABC-DLBCL, p50<sup>+</sup> correlated with significantly lower *MYC* mRNA levels. L. In GCB-DLBCL, p52<sup>+</sup> correlated with significantly lower *MYC* mRNA levels. Note: red lines indicate significant upregulation whereas blue lines indicated downregulation.

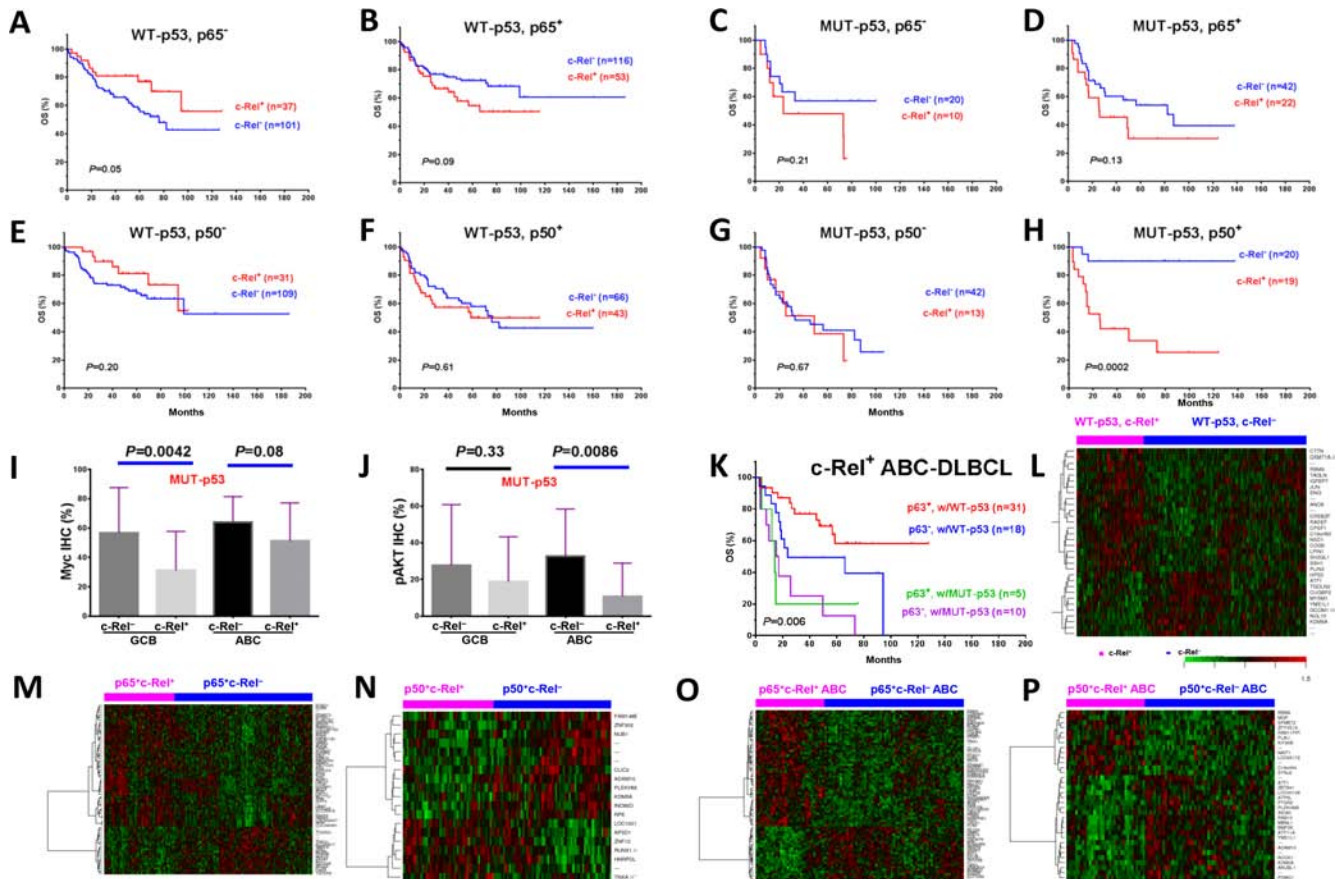

**Supplementary Figure S2.** A-D. In p65<sup>-</sup> DLBCL with wild-type-p53 (WT-p53), c-Rel nuclear expression correlated with significantly better survival. In contrast, in p65<sup>-</sup> DLBCL with mutated p53 (MUT-p53), c-Rel nuclear expression showed trend toward poorer survival. In p65<sup>+</sup> DLBCL, c-Rel nuclear expression appeared to correlate with poorer survival regardless of p53 mutation status. E-H. Impact of c-Rel nuclear expression in p50<sup>-</sup> or p50<sup>+</sup> DLBCL with a wild-type or mutated p53. In p50<sup>+</sup> DLBCL with MUT-p53, c-Rel nuclear expression correlated with significantly poorer survival. I-J. c-Rel positivity correlated with lower levels of pAKT and Myc in DLBCL with a mutated p53, most significantly in GCB- and ABC-DLBCL respectively. K. The correlation of p63 expression with better survival in patients with wild-type p53 was abrogated by p53 mutations in ABC-DLBCL. Note: blue lines indicated downregulation with significant or border-line *P* values. L. Heatmap by gene expression profiling analysis in DLBCL with WT-p53. M-N. Heatmaps by gene expression profiling analysis in DLBCL with concurrent c-Rel/p65 or c-Rel/p50 activation. O-P. Heatmaps by gene expression profiling analysis in ABC-DLBCL with concurrent c-Rel/p65 or c-Rel/p50 activation.

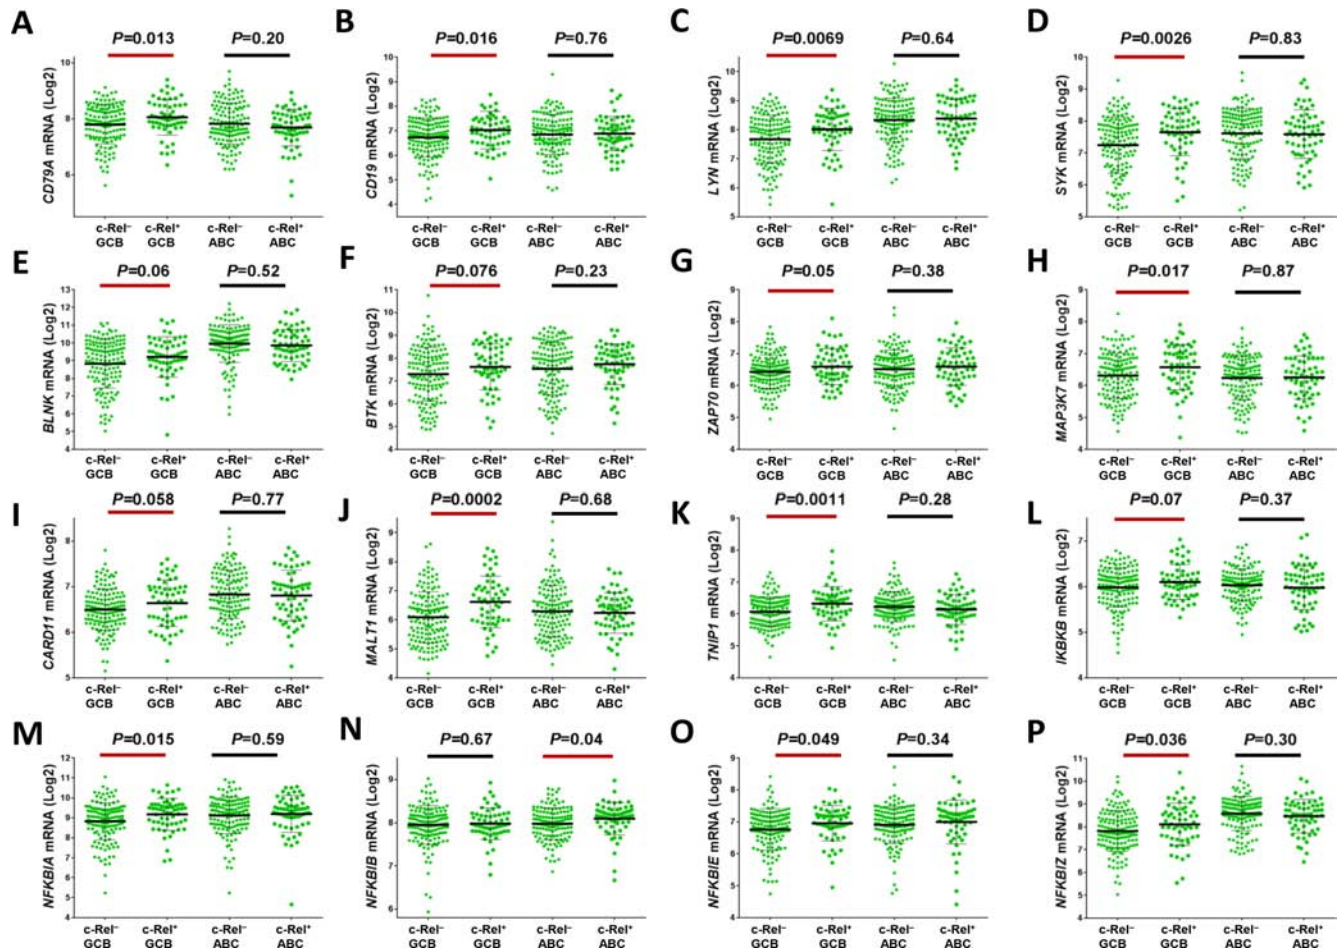

**Supplementary Figure S3. Gene expression analysis of upstream regulators for c-Rel activation.** A-J. Genes involved in the BCR signaling cascade, including *CD79A*, *CD19*, *LYN*, *SYK*, *CARD11*, *MALT1*, *BLNK*, *BTK*, *ZAP70*, and *MAP3K7/TAK1* were significantly upregulated in c-Rel<sup>+</sup> compared with c-Rel<sup>-</sup> GCB-DLBCL. K. *TNIP1* negatively regulates BCR, TNF, and NF- $\kappa$ B signaling was also significantly upregulated in c-Rel<sup>+</sup> GCB-DLBCL. L. *IKKB* encoding IKK2 (but not *IKK1* gene) was upregulated in c-Rel<sup>+</sup> GCB-DLBCL with a border line *P* value. M. *NFKBIA* (encoding I $\kappa$ B $\alpha$ ) was significantly upregulated in c-Rel<sup>+</sup> GCB-DLBCL. N. *NFKBIB* (encoding I $\kappa$ B $\beta$ ) was significantly upregulated in ABC-DLBCL. O. *NFKBIE* (encoding I $\kappa$ B $\epsilon$ ) was significantly upregulated in c-Rel<sup>+</sup> GCB-DLBCL. P. c-Rel positivity correlated with significantly higher *NFKBIZ* (encoding I $\kappa$ B-zeta) mRNA levels in GCB-DLBCL. Note: red lines indicate upregulation whereas blue line indicated downregulation with significant or border-line *P* values.

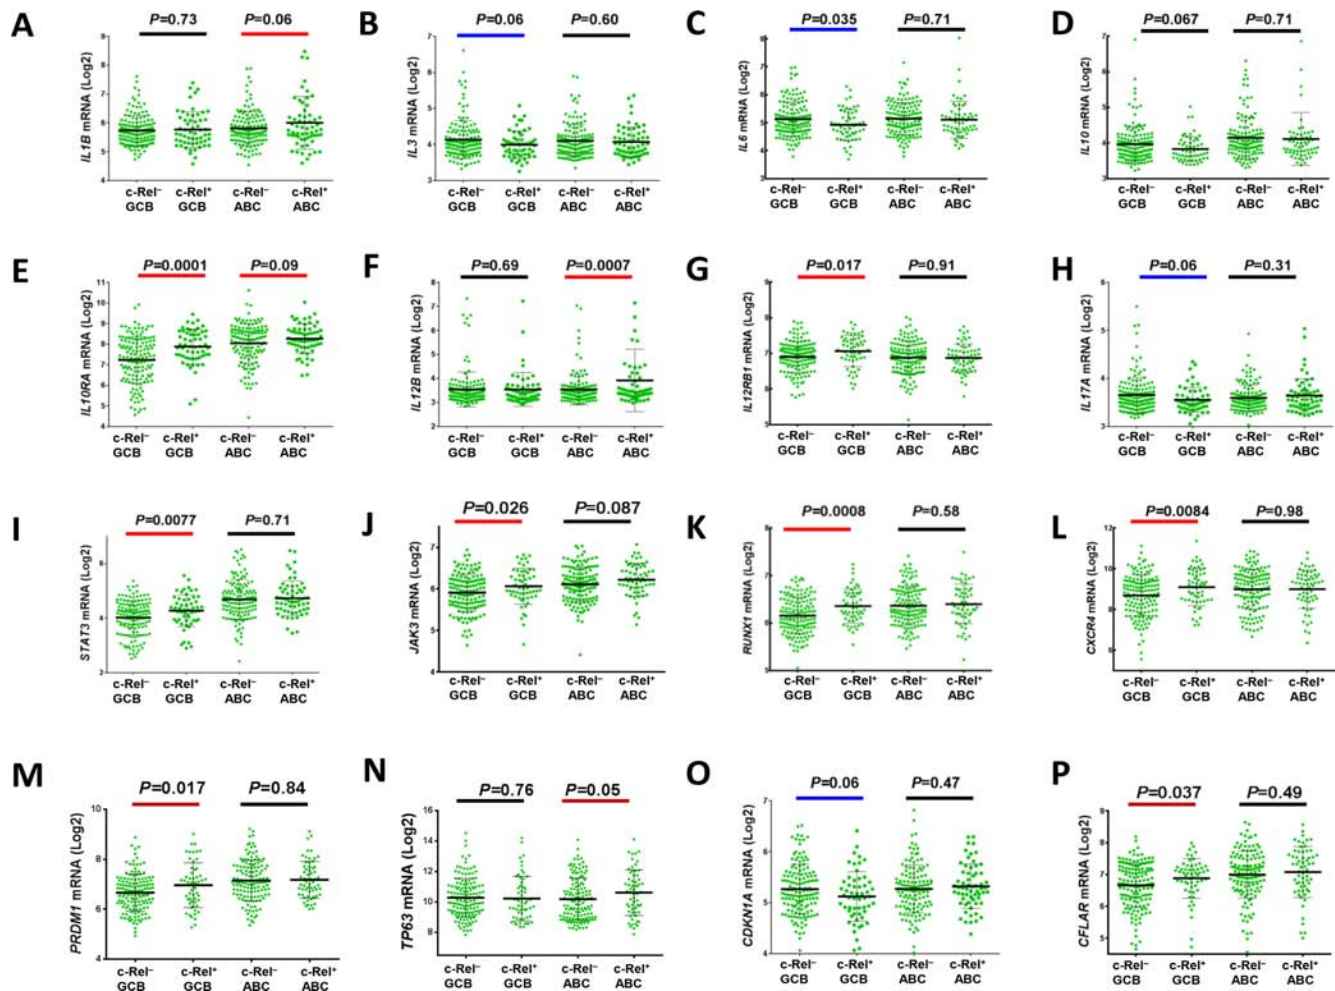

**Supplementary Figure S4. Gene expression analysis correlating with c-Rel nuclear expression in GCB- and ABC-DLBCL.** A-L. Differential expression of cytokine/chemokine related genes between c-Rel<sup>-</sup> and c-Rel<sup>+</sup> in GCB- or ABC-DLBCL. M-O. Differential expression of *PRDM1/BLIMP1*, *TP63* and *CDKN1A/p21* between c-Rel<sup>-</sup> and c-Rel<sup>+</sup> in GCB- or ABC-DLBCL. P. *CFLAR* was significantly upregulated in c-Rel<sup>+</sup> GCB-DLBCL. Note: red lines indicate upregulation whereas blue lines indicated downregulation with significant or border-line *P* values.

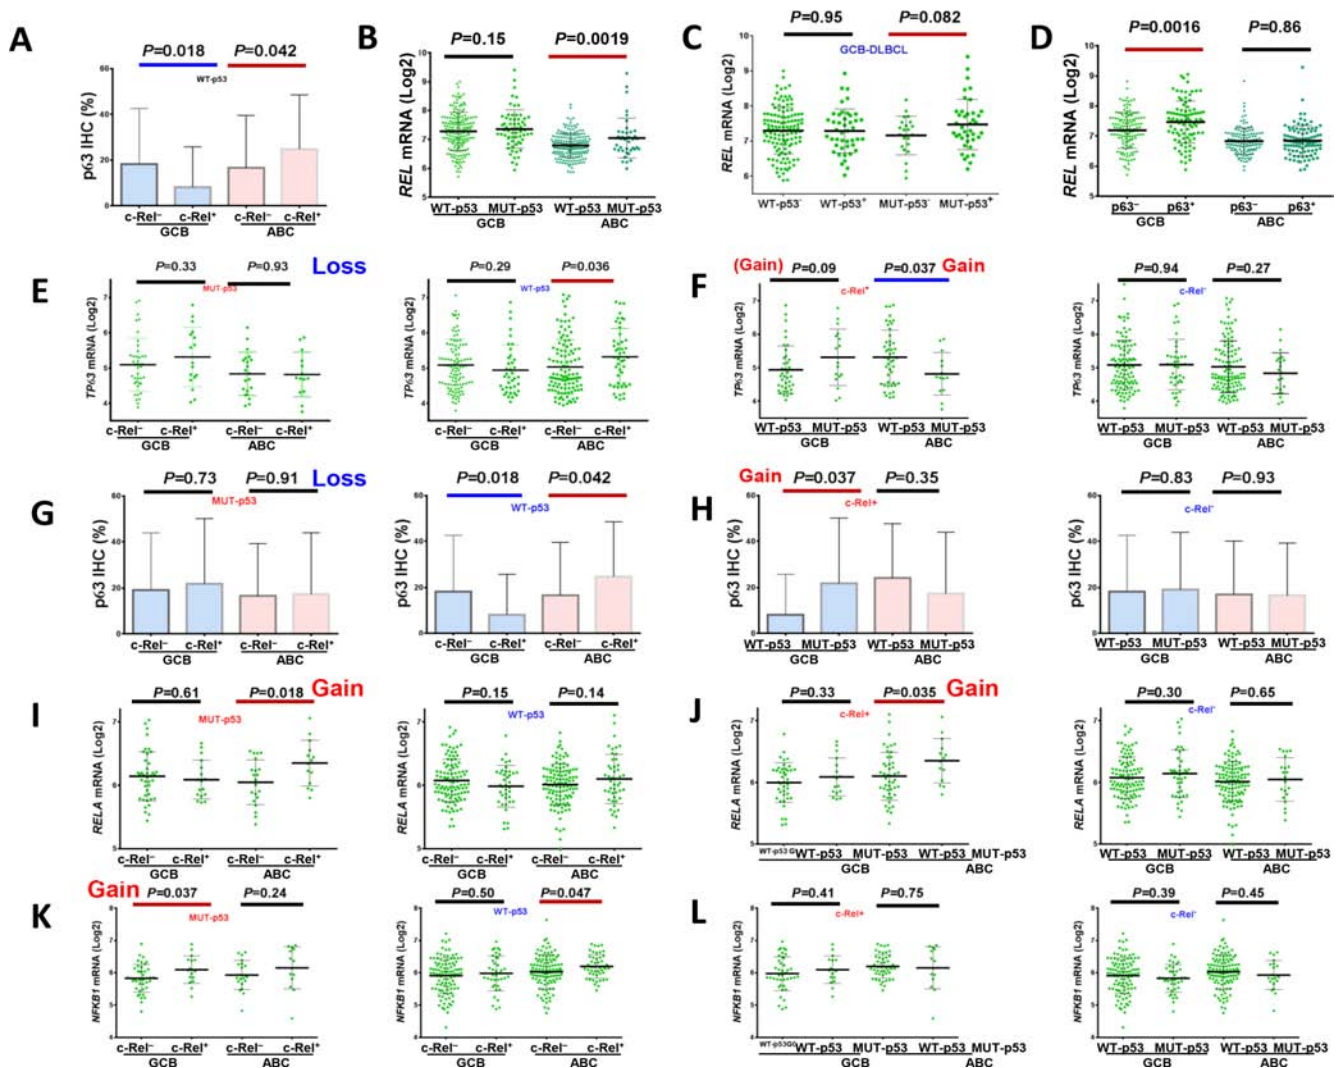

**Supplementary Figure S5.** A. In ABC-DLBCL with WT-p53, c-Rel nuclear expression was associated with significantly higher p63 protein levels. B. In ABC-DLBCL, TP53 mutations were associated with significantly higher REL mRNA levels. C. In GCB-DLBCL, expression of MUT-p53 was associated with higher REL mRNA levels with a marginal  $P$  value. D. In GCB-DLBCL, p63 expression correlated with significantly higher REL mRNA. E-H. c-Rel appeared to lose function in upregulating TP63 in ABC-DLBCL when concurrent with MUT-p53, suggested by analysis at the transcription and protein levels. I. c-Rel nuclear expression significantly correlated with RELA upregulation in ABC-DLBCL with MUT-p53, but not in ABC-DLBCL with WT-p53. J. TP53 mutations significantly correlated with RELA upregulation in ABC-DLBCL with c-Rel nuclear expression, but not in ABC-DLBCL without c-Rel nuclear expression. K-L. c-Rel nuclear expression significantly correlated with NFKB1 upregulation in GCB-DLBCL with MUT-p53, and in ABC-DLBCL with WT-p53. The expression pattern of NFKB1 in p53 mutants did not show significant changes with or without c-Rel nuclear expression.

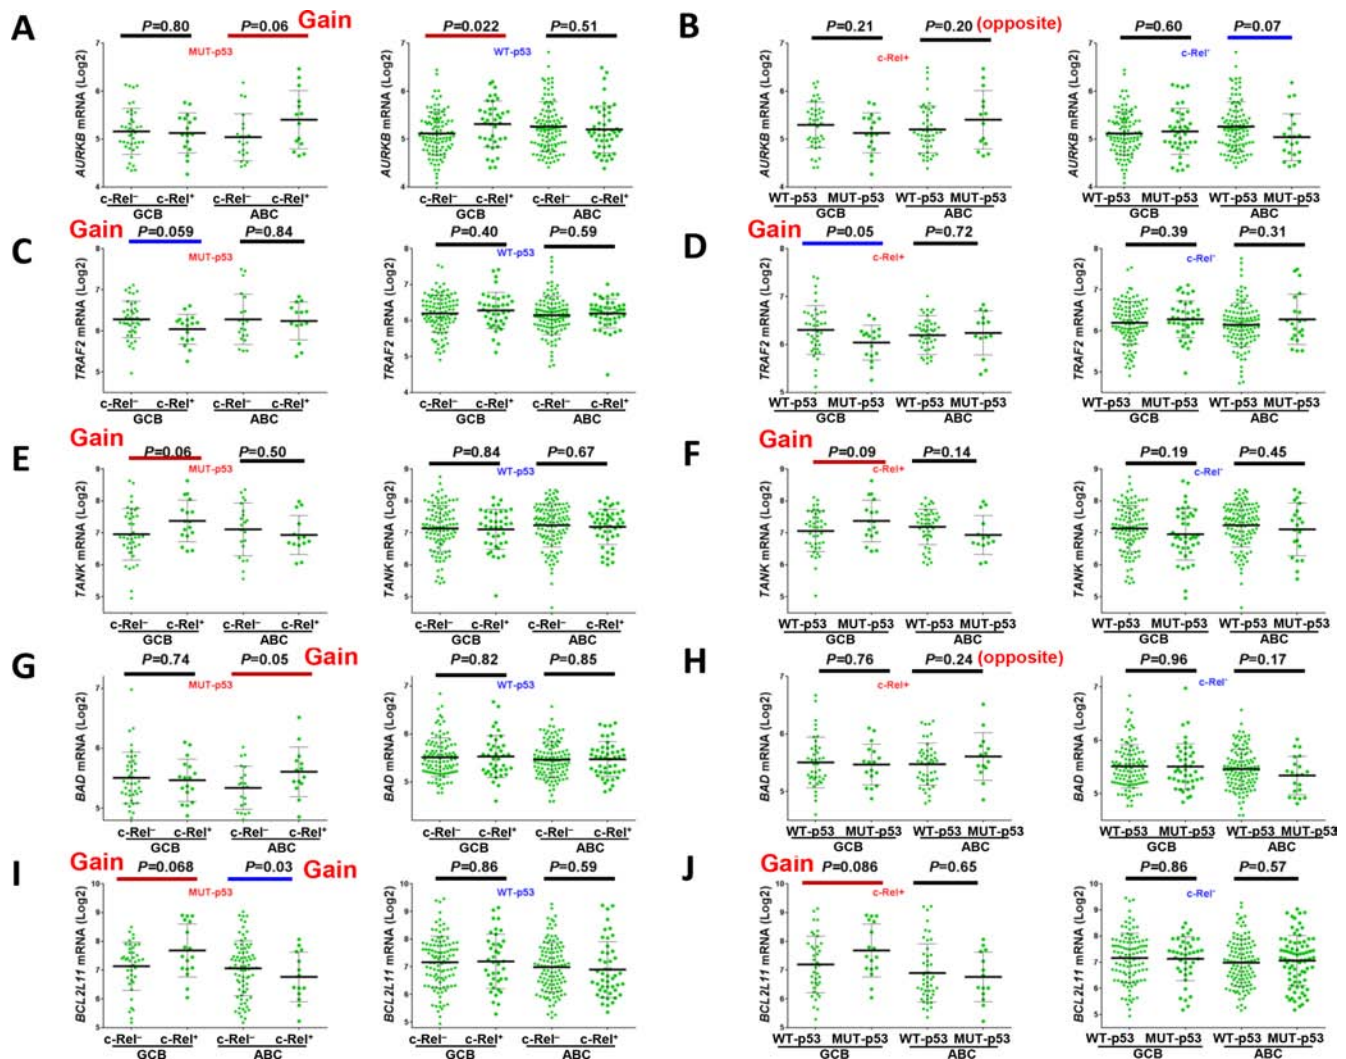

**Supplementary Figure S65.** A. In ABC-DLBCL with c-Rel nuclear expression, c-Rel nuclear expression was associated with higher *AURKB* transcription (marginal *P* value); in contrast in ABC-DLBCL without c-Rel nuclear expression, c-Rel nuclear expression was associated with higher *AURKB* transcription in GCB-DLBCL and not in ABC-DLBCL. B. In ABC-DLBCL with c-Rel nuclear expression, *TP53* mutations appeared to be associated with higher *AURKB* transcription (non-significant *P* value in this small cohort); in contrast in ABC-DLBCL without c-Rel nuclear expression, *TP53* mutations were associated with lower *AURKB* transcription (border-line *P* value). C. c-Rel nuclear expression correlated with *TRAF2* downregulation in GCB-DLBCL with MUT-p53, but not in GCB-DLBCL with WT-p53. D. *TP53* mutations correlated with *TRAF2* downregulation in GCB-DLBCL with c-Rel nuclear expression, but not in GCB-DLBCL without c-Rel nuclear expression. E. c-Rel nuclear expression correlated with *TANK* upregulation in GCB-DLBCL with MUT-p53, but not in GCB-DLBCL with WT-p53. F. In GCB-DLBCL with c-Rel nuclear expression, *TP53* mutations appeared to be associated with higher *TANK* transcription (marginal *P* value); in contrast in GCB-DLBCL without c-Rel nuclear expression, p53 mutant group appeared to have lower *TANK* transcription. G. c-Rel nuclear expression correlated with *BAD* upregulation in ABC-DLBCL with MUT-p53, but not in ABC-DLBCL with WT-p53. H. In ABC-DLBCL with c-Rel nuclear expression, *TP53* mutations appeared to have higher *BAD* transcription; in contrast in ABC-DLBCL without c-Rel nuclear expression, *TP53* mutations appear to have lower *BAD* transcription. I. c-Rel nuclear expression correlated with *BCL2L11* upregulation in GCB-DLBCL with MUT-p53 (but not in WT-p53 group), and *BCL2L11* downregulation in ABC-DLBCL with MUT-p53 (but not in WT-p53 group). J. *TP53* mutations appeared to be associated with higher *BCL2L11* expression in GCB-DLBCL with c-Rel nuclear expression, but not in GCB-DLBCL without c-Rel nuclear expression. Note: red lines indicate upregulation whereas blue lines indicated downregulation with significant or border-line *P* values.

**Supplementary Table S1. Gene signatures of c-Rel<sup>+</sup> in patients with GCB-DLBCL (false discovery rate threshold: 0.30)**

| c-Rel <sup>+</sup> vs.c-Rel <sup>-</sup> GCB-DLBCL                              |                                                                        |                                               |
|---------------------------------------------------------------------------------|------------------------------------------------------------------------|-----------------------------------------------|
| Function                                                                        | Upregulated                                                            | Downregulated                                 |
| Mitogen, cytokine, growth factor, receptors, signaling transduction             | <i>CAB39, DUSP10, DKK3</i>                                             |                                               |
| Gene expression, transcription                                                  | <i>JUN, FOXP1, FOXO3, BRD2</i>                                         | <i>TCERG1, ZNF267, GTF2H2, ZNF614, POLR1B</i> |
| Posttranscriptional regulation, transportation, degradation                     | <i>RBM5, P4HB, UBA7, ST13, AP3D1, SNX19</i>                            |                                               |
| Actin, cytoskeleton, cell morphology, adhesion, extracellular matrix, migration | <i>S100A4, TPM4, ACTG1, RHOA, SSH2, SSH1, WASF2, CAST, MYO9B, EML3</i> |                                               |
| Metabolism, redox                                                               | <i>NADSYN1, SERINC1, POMT2</i>                                         |                                               |
| Differentiation                                                                 | <i>PRDMI</i>                                                           | <i>EPO</i>                                    |
| Autoimmune                                                                      | <i>KIAA1109</i>                                                        |                                               |
| Unknown function                                                                | <i>LOC100294335 / LOC644397 / LRRC37A</i>                              | <i>C1orf49, LOC100131088, NOL10</i>           |

**Supplementary Table S2. Gene signatures of c-Rel<sup>+</sup> in the patients with p50<sup>+</sup> DLBCL (false discovery rate threshold: 0.30), and in the patients with p65<sup>+</sup> DLBCL (false discovery rate threshold: 0.10)**

| Function                                                                           | p50 <sup>+</sup> c-Rel <sup>+</sup> vs. p50 <sup>+</sup> c-Rel <sup>-</sup> |                              | p65 <sup>+</sup> c-Rel <sup>+</sup> vs. p65 <sup>+</sup> c-Rel <sup>-</sup>           |                                              |
|------------------------------------------------------------------------------------|-----------------------------------------------------------------------------|------------------------------|---------------------------------------------------------------------------------------|----------------------------------------------|
|                                                                                    | Upregulated                                                                 | Downregulated                | Upregulated                                                                           | Downregulated                                |
| Mitogen, cytokine, growth factor, receptors, signal transduction, NF-κB activation |                                                                             | <i>CLIC2, ADAM10</i>         | <i>CTGF, AEBP1, EFEMP1, GPR124, IGFBP5, RASEF, KLF6, ANXA2P2, TBC1D20, FARP1, ENG</i> |                                              |
| DNA repair                                                                         |                                                                             |                              |                                                                                       | <i>RECQL</i>                                 |
| Gene expression, transcription and translation regulation                          | <i>ZNF12, RUNX1, HNRPDL</i>                                                 | <i>ZNF302, INO80D, KDM5A</i> | <i>JUN, BRD2, SRRM2, ANKRD11, MXD4, SFMBT2, SBNO2, MLLT10</i>                         | <i>CHD2, ATF1, MYNN, ZBTB2, TCERG1</i>       |
| Actin, cytoskeleton, cell morphology, adhesion, extracellular matrix, migration    | <i>SH3D19</i>                                                               | <i>FAM148B</i>               | <i>CALD1, DNM2, SSH1, BGN, PAFAH1B1, BTBD7</i>                                        |                                              |
| Protein sorting, protein and vesicle's trafficking, transportation, chaperone      | <i>AP3D1</i>                                                                |                              | <i>GGA3, NRBP1, VPS53, AP3D1</i>                                                      | <i>SEC23B, TNPO1, PLDN, TGOLN2, SLC25A17</i> |
| Metabolism, redox                                                                  |                                                                             | <i>RPE</i>                   | <i>NADSYN1, COG1, EPHX1, SLC25A16, SIRT3</i>                                          | <i>PPARA</i>                                 |
| Tumor suppressor, necrosis                                                         |                                                                             |                              | <i>MEG3, ALKBH7</i>                                                                   |                                              |
| Degradation                                                                        |                                                                             | <i>NUB1</i>                  | <i>UBA7</i>                                                                           |                                              |
| Immune response                                                                    |                                                                             |                              | <i>SPN</i>                                                                            |                                              |
| Unknown function                                                                   | <i>NPIPL3, TNXA/TNXB</i>                                                    | <i>PLEKHM3</i>               | <i>BSG, LOC339047, NPIP, LOC399491, FKSG49</i>                                        | <i>JRKL, NARG2, NOL10</i>                    |



**Supplementary Table S3. Gene signatures of c-Rel<sup>+</sup> in patients with p50<sup>+</sup> ABC-DLBCL (false discovery rate threshold: 0.30), and in the patients with p65<sup>+</sup> ABC-DLBCL (false discovery rate threshold: 0.10)**

| Function                                                                               | p50 <sup>+</sup> c-Rel <sup>+</sup> ABC vs. p50 <sup>+</sup> c-Rel <sup>-</sup> ABC |                                     | p65 <sup>+</sup> c-Rel <sup>+</sup> ABC vs. p65 <sup>+</sup> c-Rel <sup>-</sup> ABC                          |                                                      |
|----------------------------------------------------------------------------------------|-------------------------------------------------------------------------------------|-------------------------------------|--------------------------------------------------------------------------------------------------------------|------------------------------------------------------|
|                                                                                        | Upregulated                                                                         | Downregulated                       | Upregulated                                                                                                  | Downregulated                                        |
| Mitogen, cytokine, growth factor, receptors, signal transduction, NF-kappaB activation |                                                                                     | <i>BMP2K</i>                        | <i>AEBP1, IGFBP5, GPR124, SIGIRR, SERPINE1, SEMA4C, MRV1, ENG, C7orf59, DIP2A</i>                            | <i>SETD6, GNB5</i>                                   |
| DNA replication, cell cycle                                                            |                                                                                     | <i>INO80</i>                        | <i>PURB</i>                                                                                                  | <i>MAK</i>                                           |
| Gene expression, transcription and translation regulation                              | <i>RBM9, SFMBT2</i>                                                                 | <i>ATF1, MBNL1, ZBTB41, KDM5A</i>   | <i>HIST2H2AA3 / HIST2H2AA4, TFE3, C16orf42, RRBP1, RBM9, EYA2, SBNO2, ZNF286A, LHX6, LMNA, MLLT10, HOXC8</i> | <i>ATF1, EIF1B</i>                                   |
| Actin, cytoskeleton, cell morphology, adhesion, extracellular matrix, migration        | <i>MGP, KIF26B, PLAU</i>                                                            | <i>ADAM10, ROCK1</i>                | <i>TAGLN, SERPINH1, LDB3, KIF26B, LTBP2, BGN, BTBD7, PLAU, HSPB1, VWA1, PPFIBP1</i>                          | <i>ADAM10, ROCK1, PTPRM</i>                          |
| Protein sorting, transportation, vesicle's trafficking, chaperone                      | <i>RAB11FIP3, ZFYVE19</i>                                                           | <i>RAB10, PSMG1</i>                 | <i>RAB11FIP3, KIAA0415</i>                                                                                   | <i>SLC12A9, HERC4, SERP1, SEC23B, DNAJB14, PSMG1</i> |
| Metabolism, redox                                                                      |                                                                                     | <i>ATP11A, YME1L1, ATP5L, PTGR2</i> | <i>GLYR1</i>                                                                                                 | <i>DCK, PDE12, TMX3</i>                              |
| Tumor suppressor, apoptosis                                                            | <i>NAIF1</i>                                                                        |                                     | <i>MEG3</i>                                                                                                  | <i>TNFAIP8</i>                                       |
| Unknown function                                                                       | <i>C19orf44, LOC651721, SYNJ2</i>                                                   | <i>LOC401397, PLEKHM3, ANUBL1</i>   | <i>LOC728264, ODF3B, LOC651721, BTNL8, KIAA0894</i>                                                          | <i>PLEKHM3, WDR89</i>                                |

**Supplementary Table S4. Gene signatures of c-Rel<sup>+</sup> DLBCL in patients with WT-p53 (false discovery rate threshold: 0.15)**

| c-Rel <sup>+</sup> (vs.c-Rel <sup>-</sup> ) DLBCL with WT-p53 |                                       |                                                  |
|---------------------------------------------------------------|---------------------------------------|--------------------------------------------------|
| Function                                                      | Upregulated                           | Downregulated                                    |
| Signal transduction, receptors                                | <i>IGFBP7, ENG, ANO8</i>              |                                                  |
| Cell cycle                                                    | <i>SH3GL1</i>                         |                                                  |
| Gene expression, transcription and translation regulation     | <i>JUN, CPSF1, RBM9, CREBZF, NSD1</i> | <i>CUGBP2, ATF1, KDM5A, GCOM1/GRINL1A, MYSM1</i> |
| Actin, cytoskeleton, adhesion, migration                      | <i>TAGLN, SSH1, CTTN</i>              |                                                  |
| Protein processing, transportation, vesicle's trafficking     | <i>PLIN3, RASEF, COG5</i>             | <i>HPS3, TGOLN2</i>                              |
| Metabolism                                                    | <i>LPIN1, CKMT1A/B</i>                | <i>YME1L1</i>                                    |
| Unknown function                                              | <i>C19orf60</i>                       | <i>NOL10</i>                                     |
